# Supplementary material for: Localization of Abnormal Brain Regions in Parkinsonian Disorders: An ALE Meta-Analysis
Source: medRxiv preprint, doi:10.1101/2022.04.11.22273755, version 1 (2022-04-13)
Supplement: Supplementary file 3 [file 273755_file04.docx]

**Supplementary file 3. PRISMA Flowcharts**

**Figure S3.1**


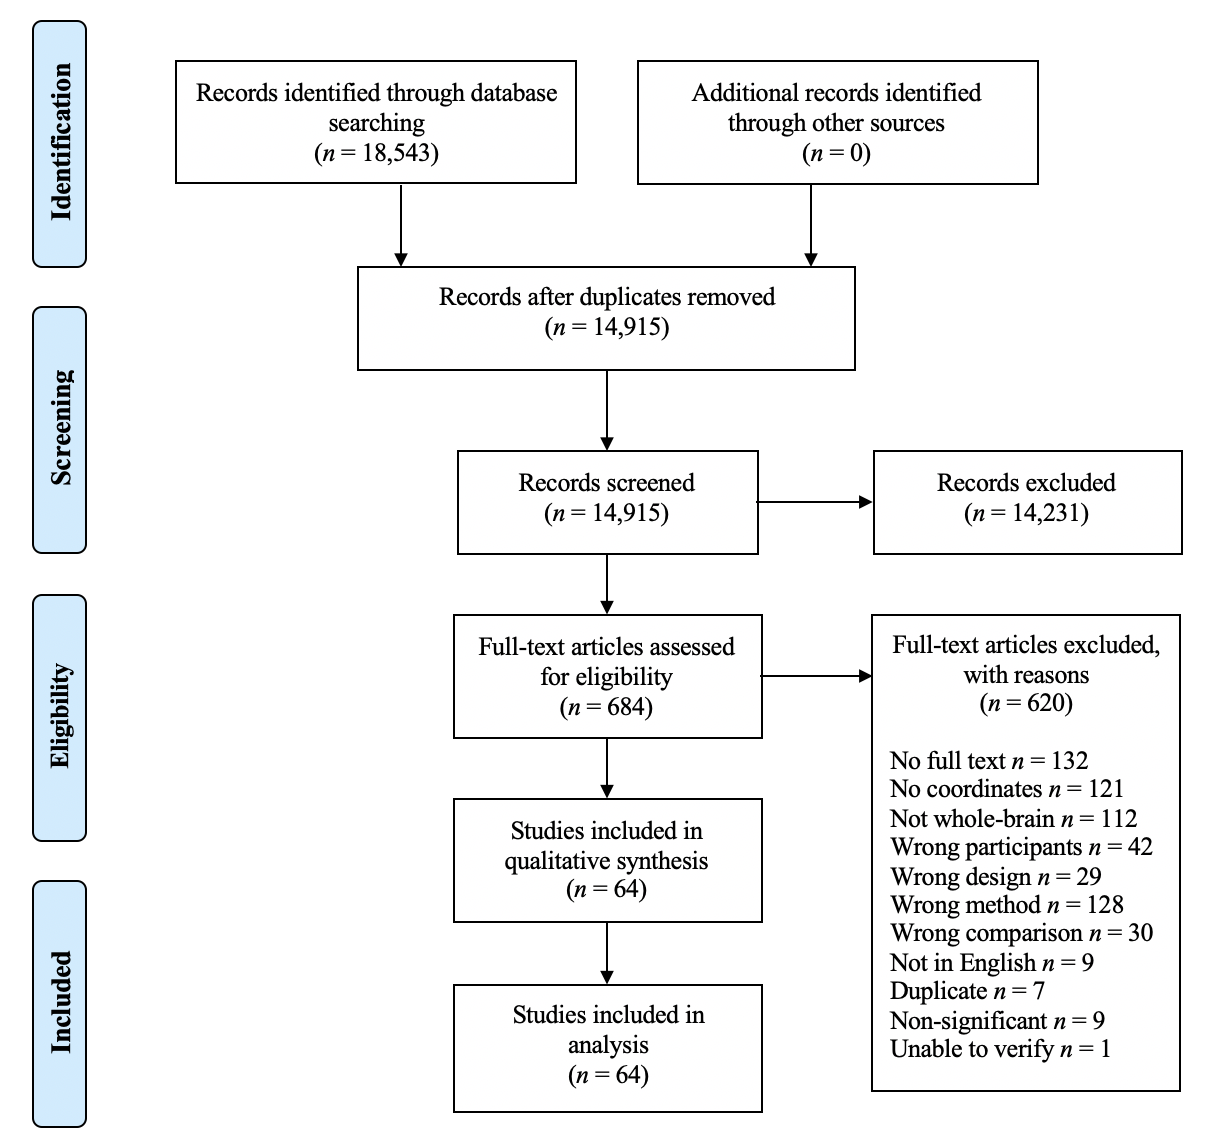
*PRISMA Systematic Literature Search Decision Flowchart for Parkinson’s disease.*

*Note.* The reason ‘Wrong method’ combines: *wrong imaging technique*(113) and *wrong analysis* (15). ‘Duplicate’ combines: *duplicate records* (6) and *duplicated samples* (3) published papers using the same participant cohorts, where possible the largest appropriate sample has been chosen.

**Figure S3.2**

**
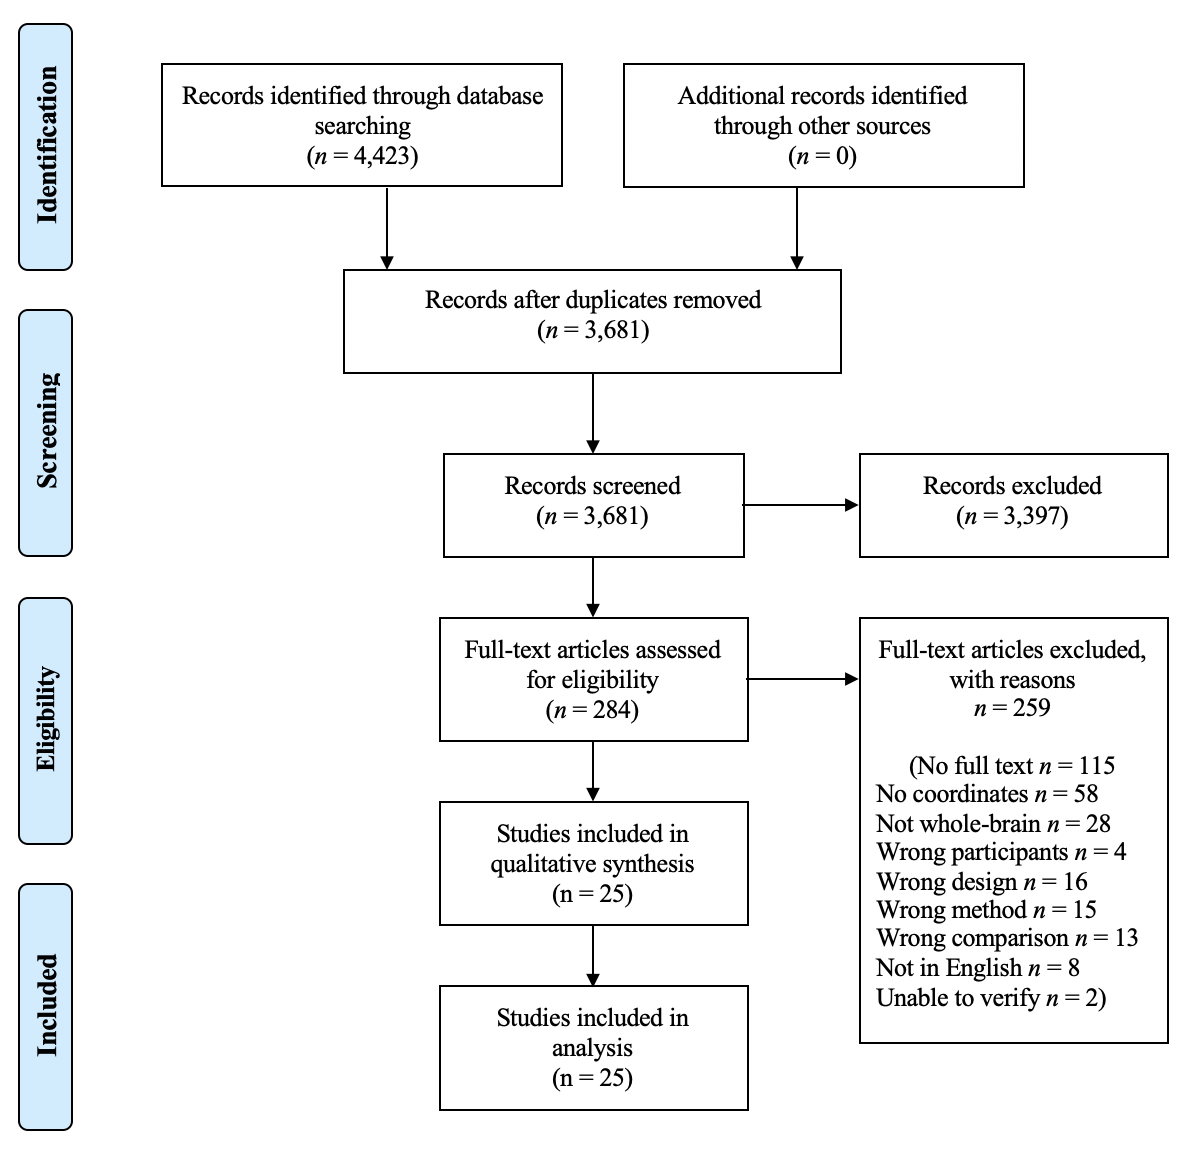
***PRISMA Systematic Literature Search Flowchart for progressive supranuclear palsy*

*Note.* The reason ‘Wrong method’ combines: *Wrong imaging technique* (9); *Results correlated with a task/symptom/effect* (1) and *Wrong analysis* (5).

**Figure S3.3**

*PRISMA Systematic Literature Search Flowchart for corticobasal degeneration*

**
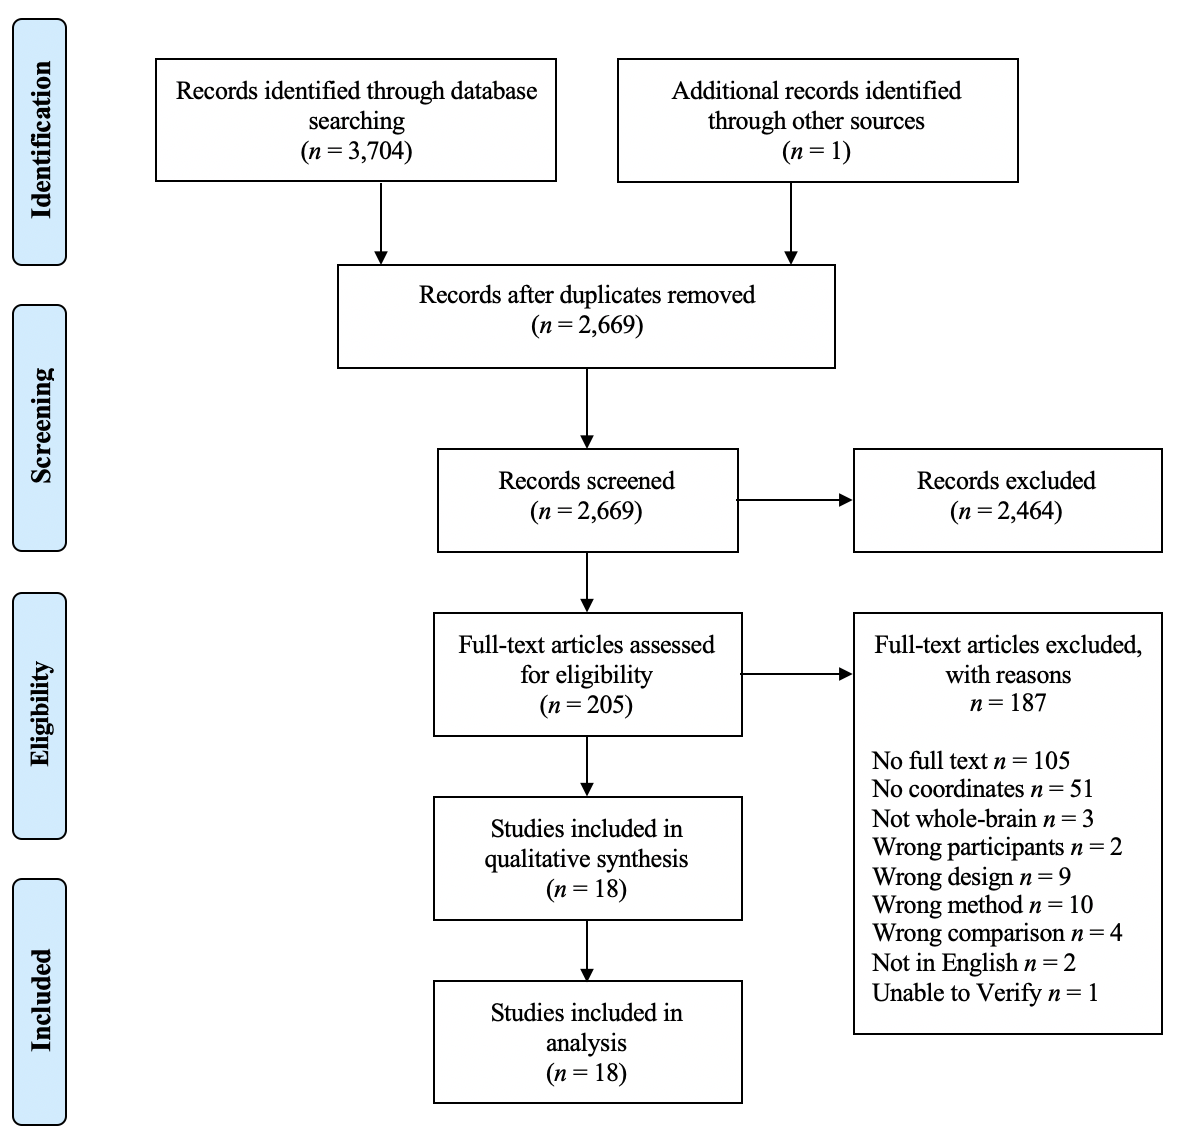
**

*Note.* The reason ‘Wrong method’ combines: *Wrong imaging technique* (3); *Results correlated with a task/symptom/effect* (7).

**Figure S3.4**

**
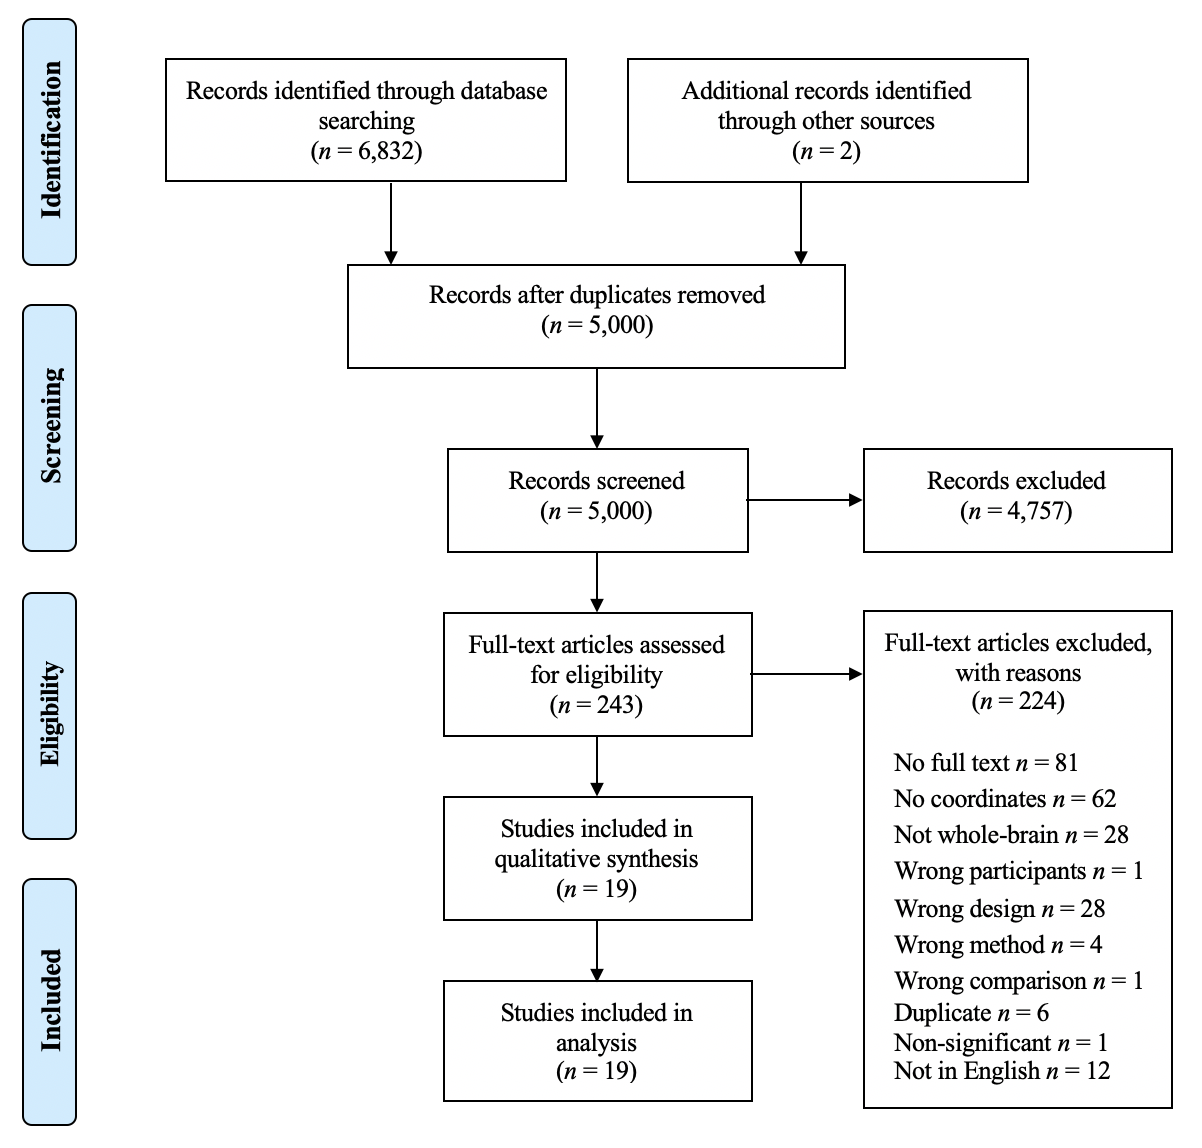
** *PRISMA Systematic Literature Search Flowchart for multiple system atrophy*

*Note.* The reason ‘Duplicate’ combines: *duplicate records* (4) and *duplicate samples* (2) papers that have published using the same participant cohorts, where possible the largest appropriate sample has been chosen.
